# Supplementary material for: Can Pharmacogenetic Variants in TPMT, MTHFR and SLCO1B1 Genes Be Used as Potential Markers of Outcome Prediction in Systemic Sclerosis Patients?
Source: MDPI journal article supplement (doi:10.3390/ijms24108538), 2023-05-10
Supplement: s1 [file s1]

Table S1. Parameters used in polygenic risk score analysis

| Genetic variant<br>(risk allele) | <i>TPMT</i><br>rs1800460<br>(A) | <i>TPMT</i><br>rs1142345<br>(G) | <i>MTHFR</i><br>rs1801133<br>(T) | <i>SLCO1B1</i><br>rs4149056<br>(C) |
|----------------------------------|---------------------------------|---------------------------------|----------------------------------|------------------------------------|
| $\beta$                          | -3.26                           | -2.67                           | -0.05                            | -2.53                              |

Risk allele is the allele associated with lower enzymatic activity. Homozygous carriers of the risk allele were valued with 1 point, heterozygotes with 0.5 points and homozygous carriers of allele associated with normal enzymatic activity were given 0 points.  $\beta$  values used in this study were extracted from genome wide association studies.

Table S2. Genotype and allele frequencies of systemic sclerosis patients (n = 102)

| Genetic variant          | Genotype | n (freq)  | HW  | Allele | Frequency in European population |
|--------------------------|----------|-----------|-----|--------|----------------------------------|
| <i>TPMT</i> rs1800460    | GG       | 97 (0.95) | 1   | G      | 0.97                             |
|                          | GA       | 5 (0.05)  |     | A      | 0.03                             |
|                          | AA       | 0         |     |        |                                  |
| <i>TPMT</i> rs1142345    | AA       | 97 (0.95) | 1   | A      | 0.97                             |
|                          | AG       | 5 (0.05)  |     | G      | 0.03                             |
|                          | GG       | 0         |     |        |                                  |
| <i>MTHFR</i> rs1801133   | CC       | 46 (0.45) | 0.3 | C      | 0.63                             |
|                          | CT       | 41 (0.40) |     | T      | 0.37                             |
|                          | TT       | 15 (0.15) |     |        |                                  |
| <i>SLCO1B1</i> rs4149056 | TT       | 70 (0.69) | 0.8 | T      | 0.84                             |
|                          | TC       | 30 (0.29) |     | C      | 0.16                             |
|                          | CC       | 2 (0.02)  |     |        |                                  |

Allele frequencies in European population were reported in 1000Genome Project Phase 3. HW, Hardy-Weinberg equilibrium.

Table S3. Association of the analysed genotypes with the risk of severe systemic sclerosis outcomes.

| Genetic variant<br>(rs number)               | Disease outcomes | Therapy      | Dominant genetic model                                        | <i>p</i><br>OR [CI 95%]      | <i>p</i> <sub>adj</sub><br>OR [CI 95%]   |
|----------------------------------------------|------------------|--------------|---------------------------------------------------------------|------------------------------|------------------------------------------|
| <i>TPMT</i> *3A<br>(rs1800460 and rs1142345) | PF               | All patients | GG <sup>R</sup> vs GA + AA<br>/<br>AA <sup>R</sup> vs AG + AA | 0.52<br>1.82 [0.23 – 11.59]  | 0.57<br>1.74 [0.21 – 11.67]              |
| <i>TPMT</i> *3A                              | PF               | AZA          | GG <sup>R</sup> vs GA + AA<br>/<br>AA vs AG + AA              | 0.40<br>3.67 [0.13 – 114.48] | 0.57<br>2.48 [0.08 – 8xe <sup>+1</sup> ] |
| <i>TPMT</i> *3A                              | PF               | MTX          | GG vs GA + AA<br>/<br>AA <sup>R</sup> vs AG + AA              | 0.59<br>0.79 [0.34 – 1.85]   | 0.69<br>0.85 [0.38 – 1.89]               |
| <i>TPMT</i> *3A                              | PF               | Other        | GG <sup>R</sup> vs GA + AA<br>/<br>/                          | 0.18<br>1.95 [0.75 – 5.03]   | 0.42<br>1.56 [0.54 – 4.53]               |

|         |                      |              |                                                               |                                    |                                |
|---------|----------------------|--------------|---------------------------------------------------------------|------------------------------------|--------------------------------|
|         |                      |              | AA <sup>R</sup> vs AG + AA                                    |                                    |                                |
| TPMT*3A | Kidney insufficiency | All patients | GG <sup>R</sup> vs GA + AA<br>/<br>AA <sup>R</sup> vs AG + AA | 0.99<br>8.01xe-8 [NA – 3.71xe+72]  | 0.99<br>7.41xe-8 [NA – 2xe+70] |
| TPMT*3A | Kidney insufficiency | AZA          | GG <sup>R</sup> vs GA + AA<br>/<br>AA <sup>R</sup> vs AG + AA | 0.99<br>5.19xe-8 [NA – 3.89xe+243] | 0.99<br>4.34xe-8 [NA – INF]    |
| TPMT*3A | Kidney insufficiency | MTX          | GG <sup>R</sup> vs GA + AA<br>/<br>AA <sup>R</sup> vs AG + AA | 0.64<br>0.83 [0.38 – 1.82]         | 0.68<br>0.84 [0.38 - 1.87]     |
| TPMT*3A | Kidney insufficiency | Other        | GG <sup>R</sup> vs GA + AA<br>/<br>AA <sup>R</sup> vs AG + AA | 0.52<br>0.74 [0.29 – 1.86]         | 0.35<br>0.61 [0.21 – 1.70]     |
| TPMT*3A | RVSP>35mmHg          | All patients | GG <sup>R</sup> vs GA + AA<br>/<br>AA <sup>R</sup> vs AG + AA | 0.63<br>1.56 [0.198 – 9.912]       | 0.66<br>1.54 [0.18 – 10.84]    |
| TPMT*3A | RVSP>35mmHg          | AZA          | GG <sup>R</sup> vs GA + AA<br>/<br>AA <sup>R</sup> vs AG + AA | 0.85<br>1.33 [0.04 – 38.59]        | 0.88<br>1.3 [0.04 – 3.9xe+1]   |
| TPMT*3A | RVSP>35mmHg          | MTX          | GG <sup>R</sup> vs GA + AA<br>/<br>AA <sup>R</sup> vs AG + AA | 0.11<br>2.09 [0.87 – 5.06]         | 0.095<br>2.11 [0.897 – 4.984]  |
| TPMT*3A | RVSP>35mmHg          | Other        | GG <sup>R</sup> vs GA + AA<br>/<br>AA <sup>R</sup> vs AG + AA | 0.52<br>0.74 [0.29 – 1.86]         | 0.25<br>0.55 [0.20 – 1.51]     |
| TPMT*3A | HUV                  | All patients | GG <sup>R</sup> vs GA + AA<br>/<br>AA <sup>R</sup> vs AG + AA | 0.99<br>3.56xe-8 [NA – 1.82xe+72]  | 0.99<br>1.7xe-7 [NA – 9xe+113] |
| TPMT*3A | HUV                  | AZA          | GG <sup>R</sup> vs GA + AA<br>/<br>AA <sup>R</sup> vs AG + AA | 1<br>1                             | 1<br>1                         |
| TPMT*3A | HUV                  | MTX          | GG <sup>R</sup> vs GA + AA<br>/<br>AA <sup>R</sup> vs AG + AA | 0.75<br>0.91 [0.50 – 1.64]         | 0.87<br>0.96 [0.54 – 1.68]     |
| TPMT*3A | HUV                  | Other        | GG <sup>R</sup> vs GA + AA<br>/<br>AA <sup>R</sup> vs AG + AA | 0.82<br>0.95 [0.61 – 1.48]         | 0.18<br>0.74 [0.49 – 1.13]     |
| TPMT*3A | FVC/DLCO>1.6         | All patients | GG <sup>R</sup> vs GA + AA<br>/<br>AA <sup>R</sup> vs AG + AA | 0.32<br>2.54 [0.40 – 19.989]       | 0.24<br>3.44 [4xe-01 – 33.99]  |
| TPMT*3A | FVC/DLCO>1.6         | AZA          | GG <sup>R</sup> vs GA + AA<br>/<br>AA <sup>R</sup> vs AG + AA | 0.69<br>1.80 [0.06 – 52.70]        | 0.39<br>5.3 [1.2xe-1 – 553.3]  |
| TPMT*3A | FVC/DLCO>1.6         | MTX          | GG <sup>R</sup> vs GA + AA<br>/<br>AA <sup>R</sup> vs AG + AA | 0.15<br>1.99 [0.79 – 5.05]         | 0.17<br>1.85 [0.78 – 4.44]     |
| TPMT*3A | FVC/DLCO>1.6         | Other        | GG <sup>R</sup> vs GA + AA                                    | 0.299                              | 0.55                           |

|  |  |  |                                 |                    |                    |
|--|--|--|---------------------------------|--------------------|--------------------|
|  |  |  | /<br>AA <sup>R</sup> vs AG + AA | 1.71 [0.63 – 4.67] | 1.39 [0.48 – 4.03] |
|--|--|--|---------------------------------|--------------------|--------------------|

| Genetic variant (rs number) | Disease outcomes     | Therapy      | Dominant genetic model     | <i>p</i><br>OR [CI 95%]                   | <i>p</i> <sub>adj</sub><br>OR [CI 95%]     |
|-----------------------------|----------------------|--------------|----------------------------|-------------------------------------------|--------------------------------------------|
| <i>MTHFR</i> rs1801133      | PF                   | All patients | CC <sup>R</sup> vs CT + TT | 0.25<br>1.11 [0.93 – 1.32]                | 0.22<br>1.11 [0.94 – 1.32]                 |
| <i>MTHFR</i> rs1801133      | PF                   | AZA          | CC <sup>R</sup> vs CT + TT | 0.42<br>1.21 [0.77 – 1.89]                | 0.74<br>1.096 [0.65 – 1.85]                |
| <i>MTHFR</i> rs1801133      | PF                   | MTX          | CC <sup>R</sup> vs CT + TT | 0.31<br>1.14 [0.88 – 1.48]                | 0.63<br>1.06 [0.83 – 1.36]                 |
| <i>MTHFR</i> rs1801133      | PF                   | Other        | CC <sup>R</sup> vs CT + TT | 0.68<br>1.07 [0.79 – 1.45]                | 0.71<br>1.06 [0.77 – 1.46]                 |
| <i>MTHFR</i> rs1801133      | Kidney insufficiency | All patients | CC <sup>R</sup> vs CT + TT | 0.97<br>0.99 [0.85 – 1.17]                | 0.89<br>0.99 [0.84 – 1.16]                 |
| <i>MTHFR</i> rs1801133      | Kidney insufficiency | AZA          | CC <sup>R</sup> vs CT + TT | 0.21<br>1.25 [0.89 – 1.74]                | 0.197<br>1.30 [0.89 – 1.91]                |
| <i>MTHFR</i> rs1801133      | Kidney insufficiency | MTX          | CC <sup>R</sup> vs CT + TT | 0.24<br>1.16 [0.91 – 1.46]                | 0.34<br>1.13 [0.88 – 1.45]                 |
| <i>MTHFR</i> rs1801133      | Kidney insufficiency | Other        | CC <sup>R</sup> vs CT + TT | 0.12<br>0.79 [0.59 – 1.05]                | <b>0.049</b><br><b>0.74 [0.55 – 0.989]</b> |
| <i>MTHFR</i> rs1801133      | RVSP>35mmHg          | All patients | CC <sup>R</sup> vs CT + TT | <b>0.03</b><br><b>1.22 [1.02 – 1.45]</b>  | <b>0.045</b><br><b>1.19 [1.006 – 1.43]</b> |
| <i>MTHFR</i> rs1801133      | RVSP>35mmHg          | AZA          | CC <sup>R</sup> vs CT + TT | <b>0.04</b><br><b>1.69 [1.08 – 2.64]</b>  | <b>0.02</b><br><b>1.95 [1.18 – 3.25]</b>   |
| <i>MTHFR</i> rs1801133      | RVSP>35mmHg          | MTX          | CC <sup>R</sup> vs CT + TT | 0.64<br>0.94 [0.71 – 1.23]                | 0.37<br>0.88 [0.67 – 1.16]                 |
| <i>MTHFR</i> rs1801133      | RVSP>35mmHg          | Other        | CC <sup>R</sup> vs CT + TT | <b>0.009</b><br><b>1.45 [1.11 – 1.89]</b> | <b>0.03</b><br><b>1.45 [1.11 – 1.89]</b>   |
| <i>MTHFR</i> rs1801133      | HUV                  | All patients | CC <sup>R</sup> vs CT + TT | 0.28<br>0.95 [0.87 – 1.04]                | 0.34<br>0.96 [0.88 – 1.04]                 |
| <i>MTHFR</i> rs1801133      | HUV                  | AZA          | CC <sup>R</sup> vs CT + TT | NaN                                       | NaN                                        |
| <i>MTHFR</i> rs1801133      | HUV                  | MTX          | CC <sup>R</sup> vs CT + TT | 0.81<br>0.98 [0.82 – 1.17]                | 0.47<br>0.94 [0.79 – 1.12]                 |
| <i>MTHFR</i> rs1801133      | HUV                  | Other        | CC <sup>R</sup> vs CT + TT | 0.13<br>0.90 [0.79 – 1.03]                | 0.26<br>0.93 [0.82 – 1.05]                 |
| <i>MTHFR</i> rs1801133      | FVC/DLCO>1.6         | All patients | CC <sup>R</sup> vs CT + TT | 0.52<br>1.06 [0.88 – 1.29]                | 0.77<br>1.03 [0.86 – 1.23]                 |
| <i>MTHFR</i> rs1801133      | FVC/DLCO>1.6         | AZA          | CC <sup>R</sup> vs CT + TT | 0.72<br>0.91 [0.55 – 1.51]                | 0.96<br>0.98 [0.54 – 1.79]                 |
| <i>MTHFR</i> rs1801133      | FVC/DLCO>1.6         | MTX          | CC <sup>R</sup> vs CT + TT | 0.91<br>1.02 [0.76 – 1.36]                | 0.86<br>1.03 [0.78 – 1.35]                 |
| <i>MTHFR</i> rs1801133      | FVC/DLCO>1.6         | Other        | CC <sup>R</sup> vs CT + TT | 0.21<br>1.23 [0.89 – 1.67]                | 0.58<br>1.09 [0.798 –                      |

|  |  |  |  |  |        |
|--|--|--|--|--|--------|
|  |  |  |  |  | 1.502] |
|--|--|--|--|--|--------|

| Genetic variant (rs number) | Disease outcomes     | Therapy      | Dominant genetic model     | $p$<br>OR [CI 95%]                       | $p_{adj}$<br>OR [CI 95%]                 |
|-----------------------------|----------------------|--------------|----------------------------|------------------------------------------|------------------------------------------|
| <i>SLCO1B1</i> rs4149056    | PF                   | All patients | TT <sup>R</sup> vs TC + CC | 0.71<br>0.96 [0.799 – 1.165]             | 0.38<br>0.92 [0.76 – 1.11]               |
| <i>SLCO1B1</i> rs4149056    | PF                   | AZA          | TT <sup>R</sup> vs TC + CC | <b>0.04</b><br><b>0.64 [0.43 – 0.95]</b> | 0.12<br>0.66 [0.41 – 1.08]               |
| <i>SLCO1B1</i> rs4149056    | PF                   | MTX          | TT <sup>R</sup> vs TC + CC | 0.85<br>0.97 [0.74 – 1.28]               | 0.89<br>1.02 [0.79 – 1.32]               |
| <i>SLCO1B1</i> rs4149056    | PF                   | Other        | TT <sup>R</sup> vs TC + CC | 0.26<br>1.22 [0.87 – 1.72]               | 0.62<br>1.11 [0.74 – 1.66]               |
| <i>SLCO1B1</i> rs4149056    | Kidney insufficiency | All patients | TT <sup>R</sup> vs TC + CC | 0.14<br>0.88 [0.74 – 1.04]               | 0.09<br>0.86 [0.72 – 1.02]               |
| <i>SLCO1B1</i> rs4149056    | Kidney insufficiency | AZA          | TT <sup>R</sup> vs TC + CC | 0.86<br>1.03 [0.73 – 1.456]              | 0.85<br>1.04 [0.69 – 1.59]               |
| <i>SLCO1B1</i> rs4149056    | Kidney insufficiency | MTX          | TT <sup>R</sup> vs TC + CC | <b>0.03</b><br><b>0.76 [0.59 – 0.96]</b> | <b>0.04</b><br><b>0.77 [0.60 – 0.99]</b> |
| <i>SLCO1B1</i> rs4149056    | Kidney insufficiency | Other        | TT <sup>R</sup> vs TC + CC | 1<br>1 [0.71 – 1.40]                     | 0.99<br>0.99 [0.67 – 1.48]               |
| <i>SLCO1B1</i> rs4149056    | RVSP>35mmHg          | All patients | TT <sup>R</sup> vs TC + CC | 0.21<br>0.88 [0.73 – 1.07]               | 0.12<br>0.86 [0.71 – 1.04]               |
| <i>SLCO1B1</i> rs4149056    | RVSP>35mmHg          | AZA          | TT <sup>R</sup> vs TC + CC | 0.95<br>0.98 [0.58 – 1.66]               | 0.969<br>0.99 [0.51 – 1.89]              |
| <i>SLCO1B1</i> rs4149056    | RVSP>35mmHg          | MTX          | TT <sup>R</sup> vs TC + CC | <b>0.04</b><br><b>0.74 [0.56 – 0.97]</b> | 0.07<br>0.77 [0.58 – 1.009]              |
| <i>SLCO1B1</i> rs4149056    | RVSP>35mmHg          | Other        | TT <sup>R</sup> vs TC + CC | 1<br>1 [0.71 – 1.40]                     | 0.96<br>0.99 [0.67 – 1.46]               |
| <i>SLCO1B1</i> rs4149056    | HUV                  | All patients | TT <sup>R</sup> vs TC + CC | 0.32<br>1.05 [0.95 – 1.16]               | 0.697<br>1.02 [0.93 – 1.12]              |
| <i>SLCO1B1</i> rs4149056    | HUV                  | AZA          | TT <sup>R</sup> vs TC + CC | NaN                                      | NaN                                      |
| <i>SLCO1B1</i> rs4149056    | HUV                  | MTX          | TT <sup>R</sup> vs TC + CC | 0.74<br>0.97 [0.80 – 1.17]               | 0.91<br>0.99 [0.82 – 1.19]               |
| <i>SLCO1B1</i> rs4149056    | HUV                  | Other        | TT <sup>R</sup> vs TC + CC | <b>0.01</b><br><b>1.22 [1.05 – 1.41]</b> | 0.197<br>1.11 [0.95 – 1.30]              |
| <i>SLCO1B1</i> rs4149056    | FVC/DLCO>1.6         | All patients | TT <sup>R</sup> vs TC + CC | 0.44<br>1.08 [0.88 – 1.33]               | 0.46<br>1.08 [0.89 – 1.31]               |
| <i>SLCO1B1</i> rs4149056    | FVC/DLCO>1.6         | AZA          | TT <sup>R</sup> vs TC + CC | 0.72<br>1.09 [0.66 – 1.83]               | 0.969<br>0.99[0.53 – 1.82]               |
| <i>SLCO1B1</i> rs4149056    | FVC/DLCO>1.6         | MTX          | TT <sup>R</sup> vs TC + CC | 0.33<br>1.16 [0.86 – 1.58]               | 0.24<br>1.19 [0.89 – 1.58]               |
| <i>SLCO1B1</i> rs4149056    | FVC/DLCO>1.6         | Other        | TT <sup>R</sup> vs TC + CC | 0.86<br>1.03 [0.72 – 1.49]               | 0.82<br>1.05 [0.70 – 1.56]               |

Association of analyzed genotypes with severe outcomes of systemic sclerosis was tested using logistic regression model, where dominant genetic model was applied. Group that included homozygous carriers of allele associated with normal enzymatic functioning, which was also the more frequent allele, was set to be a referent group in logistic regression model. All genotyped patients had TPMT\*3A haplotype, meaning that patients carrying TPMT c.460A also carried TPMT c.719G. Hence, all results were the same for these two variants. Bolded p values were considered significant.

NaN, not a number, in the group of patients treated with Imuran no-one developed HUV; OR, odds ratio; CI, confidence interval;  $p_{adj}$ , adjusted for age and gender; PF, pulmonary fibrosis; RVSP, right ventricle systolic pressure; HUV, hypocomplementemic urticarial vasculitis; FVC/DLCO, ratio between forced vital capacity (FVC) and diffusing capacity of carbon monoxide (DLCO); AZA, Azathioprine; MTX, Methotrexate.
